# Supplementary material for: Overexpression of <i>BmJHBPd2</i> Repressed the Silk Synthesis by Inhibiting the <span aria-describedby="tippy-27">JH/Kr-h1 Signal Pathway in <i>Bombyx</i><i> </i><i>mori</i>
Source: Preprints.org preprint supplement (doi:10.20944/preprints202305.2028.v1), 2023-05-30
Supplement: Supplementary file 1 [file supplementary]

## Supplementary Materials

**Table.S1.** Primer sets used in the transgenic overexpression.

**Table.S2.** Primer sets used in qRT-PCR.

**Figure S1.** Main economic characters of different silk-producing strain.

**Figure S2.** Expression of silk protein transcription factor in wild type and transgenic lines.

**Figure S3.** Overexpression of *BmJHBPd2* results in inhibition of JH catabolic enzyme in silk gland.

| Gene                                   | 5'-3'                                                               |
|----------------------------------------|---------------------------------------------------------------------|
| <i>BmJHBPd2</i> F<br>( <i>Bam</i> H I) | <u>GGATCC</u> ATGTGGACCGGTCTGTTTTAGT                                |
| <i>BmJHBPd2</i> R ( <i>Not</i> I-Myc)  | <u>GCGGCCGCTTACAGATCCTCTTCTGAGATGAGTTTTGTTCTTCGGGCATTAATTCGTCAA</u> |

**Table.S1.** Primer sets used in the transgenic overexpression. The underlined sequence is *Bam*H I restriction site, *Not* I restriction site and Myc tag sequence.

| Gene               | 5'-3'                           |
|--------------------|---------------------------------|
| <i>BmJHBPd2</i> -F | <u>TAGAAAAGGCTGTGTTTCGC</u>     |
| <i>BmJHBPd2</i> -R | <u>ATGAGTGATCCGCAGATTI</u>      |
| <i>BmfibH</i> -F   | <u>TCTGTGTCATCTGCTTCATCTCG</u>  |
| <i>BmfibH</i> -R   | <u>TATCCAGGACGAAGTAAGAAACAA</u> |
| <i>BmfibL</i> -F   | <u>ATACCGATTGGTCACATAACAG</u>   |
| <i>BmfibL</i> -R   | <u>GCAGATAGATGGGCGATAA</u>      |
| <i>BmP25</i> -F    | <u>AGCCGCTGTGGCAGTTTTG</u>      |
| <i>BmP25</i> -R    | <u>TAGGTGGCGTTGAAGTATGG</u>     |
| <i>BmKr-h1</i> -F  | <u>CTTCCTCTACTCCACCT</u>        |
| <i>BmKr-h1</i> -R  | <u>GGCAACGAAATGTAATGT</u>       |
| <i>BmMet1</i> -F   | <u>AATCTTGCCACCAACAGC</u>       |
| <i>BmMet1</i> -R   | <u>ACCCAACGCACATCTTCT</u>       |

---

|                  |                               |
|------------------|-------------------------------|
| <i>BmMet2-F</i>  | <u>CCGAACCAACGCAGTATGTAA</u>  |
| <i>BmMet2-R</i>  | <u>ACGCACGACGCCAATGA</u>      |
| <i>BmSRC-F</i>   | <u>TCAAACGAGTCAAATAGGGTCA</u> |
| <i>BmSRC-R</i>   | <u>GCGGTCGGTGGTAGGGTT</u>     |
| <i>Bmjhe-F</i>   | <u>ACAGATTGGCGGTTTTCGGA</u>   |
| <i>Bmjhe-R</i>   | <u>CCCTTAGCGGCATCAGACAT</u>   |
| <i>Bmjheh-F</i>  | <u>GGACTCTTCGGGTTAGTGATAA</u> |
| <i>Bmjheh-R</i>  | <u>TGTGGTATTTCTGTCATTCC</u>   |
| <i>Bmdimm-F</i>  | <u>CGTGGAACCCGCATTTGTA</u>    |
| <i>Bmdimm-R</i>  | <u>AACCTCGGCAATCCAGTCG</u>    |
| <i>Bmsage-F</i>  | <u>AGCAATCACGAAGGTCCGC</u>    |
| <i>Bmsage-R</i>  | <u>CGTATCGTGGTTGGAGTCGT</u>   |
| <i>Bmsgf-1-F</i> | <u>ATCCGACATTCGCTGTCCTT</u>   |
| <i>Bmsgf-1-R</i> | <u>TGACGTCGCAAGAAACAACC</u>   |
| <i>BmEcR-F</i>   | <u>GCTGGTCTGATAACGGTGGCT</u>  |
| <i>BmEcR-R</i>   | <u>CAAGGATTCCGGCGACATAAC</u>  |
| <i>BmHR3-F</i>   | <u>TCAACGAGAAGACACCACGG</u>   |
| <i>BmHR3-R</i>   | <u>AGAAACATCCTGGGGCTTGC</u>   |
| <i>BmE75A-F</i>  | <u>GAAATCCGCGCTATGAGGC</u>    |
| <i>BmE75A-R</i>  | <u>TTTAGCGAGCACCGAATGC</u>    |
| <i>BmE74A-F</i>  | <u>AGCAGTCAACTGCAAGGGTA</u>   |
| <i>BmE74A-R</i>  | <u>GTGCCCCGATCTAAGGAGTTG</u>  |
| <i>BmUSP-F</i>   | <u>AGAAGTGGACGTTCTTCGAG</u>   |
| <i>BmUSP-R</i>   | <u>GGTGGAACAGGTAGAGGTGC</u>   |
| <i>BmBrc-F</i>   | <u>TCGCTGACAAACACGCTG</u>     |
| <i>BmBrc-R</i>   | <u>ATGGTAAGAACGGCGGAC</u>     |

---

|                   |                              |
|-------------------|------------------------------|
| <i>BmRPL3-2-F</i> | <u>TTCGTA</u> CTGGCTCTTCTCGT |
| <i>BmRPL3-2-R</i> | CAAAGTTGATAGCAATTCCT         |

**Table.S2.** Primer sets used in qRT-PCR.

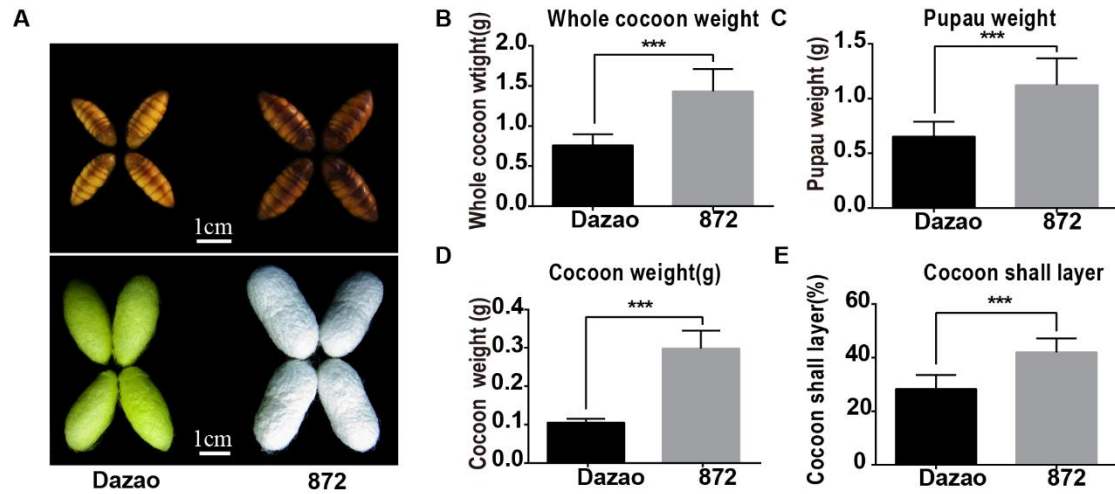

**Figure S1.** Main economic characters of different silk-producing strain. A. Pupaus and cocoons of *Dazao* and *S872*. B. Cocoon weight from *Dazao* and *S872*. C. Pupau weight from *Dazao* and *S872*. D. Cocoon shell weight from *Dazao* and *S872*. E. Cocoon shell percentage from *Dazao* and *S872*. Data are means  $\pm$  SD. \*\*\* $P < 0.001$ .

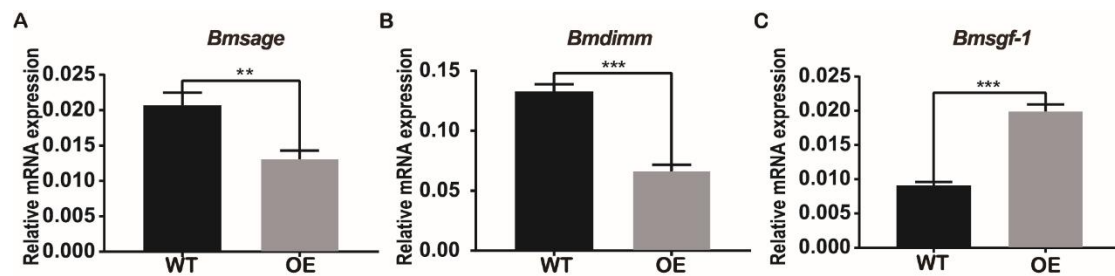

**Figure S2.** Expression of silk protein transcription factor in wild type and transgenic lines. *BmRpl3* expression was used as a control. Results are expressed as means S.D. of three independent experiments. \*  $P < 0.05$ ; \*\*  $P < 0.01$ ; \*\*\*  $P < 0.001$ .

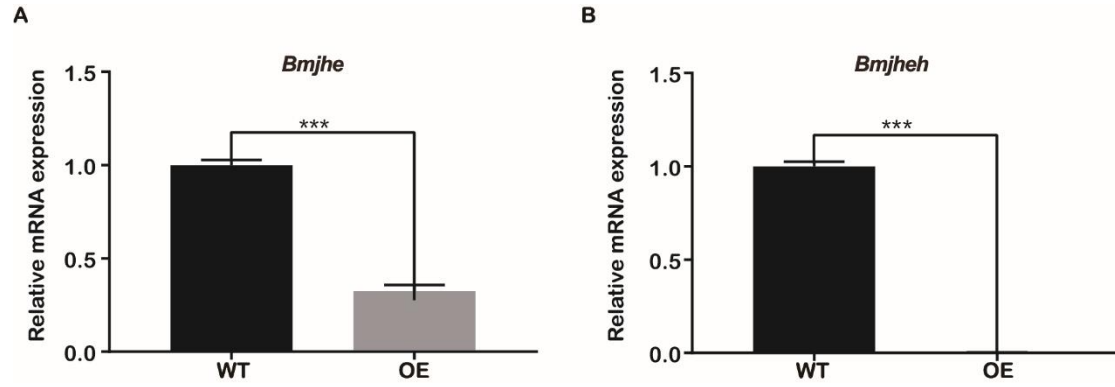

**Figure S3.** Overexpression of *BmJHBPd2* results in inhibition of JH catabolic enzyme in silk gland. The following JH catabolic enzyme related genes were selected: JHE(A) and JHEH(B). *BmRpl3* expression is shown as a control. Results are expressed as means S.D. of three independent experiments. \*  $P < 0.05$ ; \*\*  $P < 0.01$ ; \*\*\*  $P < 0.001$ .
